# Supplementary material
Source: PubMed Central journal article supplement (PMC5359476)
Supplement: AEM.03230-16_zam999117747s1.pdf [file AEM.03230-16_zam999117747s1.pdf]

**Supplementary Information for**  
**Identification and functional analysis of Dicer and Argonaute genes involved in**  
**RNA interference in the entomopathogenic fungus *Metarhizium robertsii***

Huimin Meng<sup>1,2,#</sup>, Zhangxun Wang<sup>1,3,#</sup>, Yulong Wang<sup>1</sup>, Hong Zhu<sup>1</sup> and Bo Huang<sup>1,\*</sup>

<sup>1</sup> Anhui Provincial Key Laboratory of Microbial Pest Control, Anhui Agricultural University,  
Hefei 230036, China

<sup>2</sup> Shandong Provincial Key Laboratory of Synthetic Biology, Qingdao Institute of Bioenergy and  
Bioprocess Technology, Chinese Academy of Sciences, Qingdao 266101, China.

<sup>3</sup> School of Plant Protection, Anhui Agricultural University, Hefei 230036, China

<sup>#</sup> Both authors contributed equally to this work.

<sup>\*</sup> Corresponding author.

Anhui Provincial Key Laboratory of Microbial Pest Control, Anhui Agricultural University, Hefei  
230036, China.

Tel./ Fax: +86-551- 65786211.

E-mail address: [bhuang@ahau.edu.cn](mailto:bhuang@ahau.edu.cn) (B.Huang)

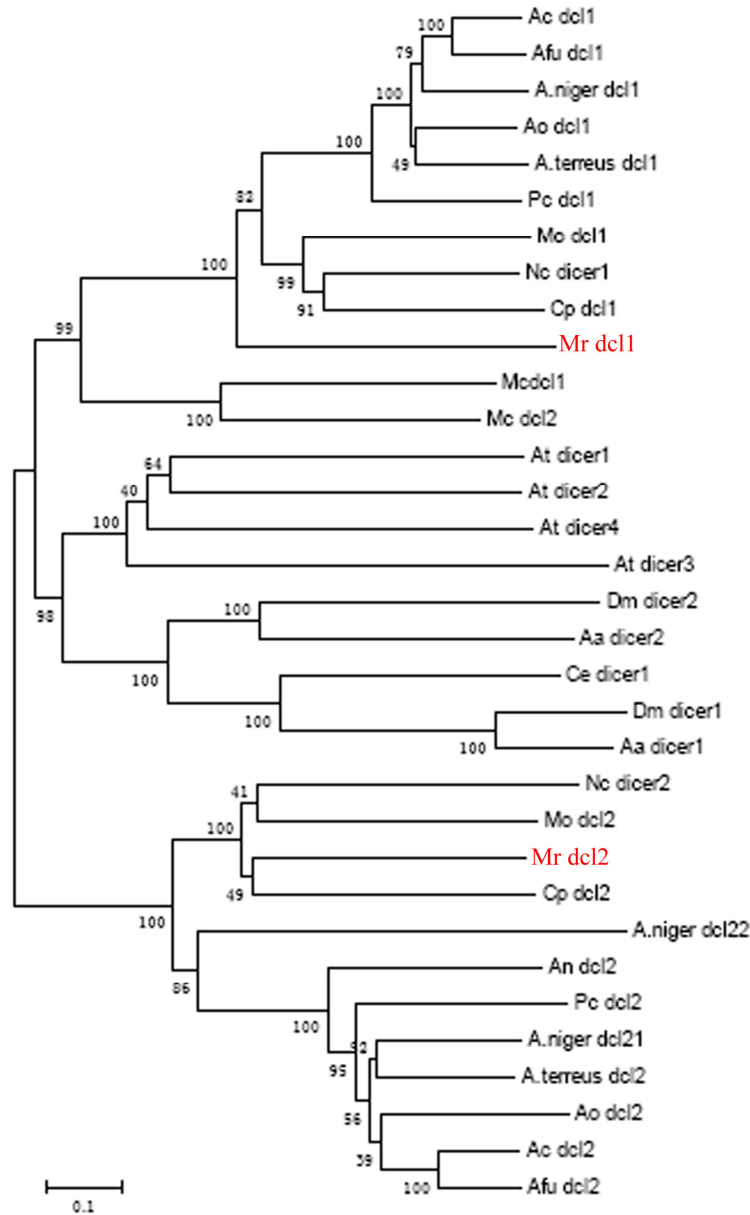

Fig.S1 Sequence alignment and phylogenetic tree of MaDCLs. Phylogenetic tree of Dicer proteins from plants, animals, and fungi.

*D.melanogaster*(Dm) Dicer1 (NP\_524453.1), Dicer2 (NP\_523778.2); *C. elegans*(Ce) Dicer1 (NP\_498761.1); *A.aegypti*(Aa) Dicer1 (XP\_001659747.1), Dicer2 (AAW48725.1); *A. thaliana*(At) DCL1 (NP\_171612.1), DCL2 (NP\_001189798.1), DCL3 (NP\_001154662.2), DCL4 (NP\_197532.3); *N. crassa*(Nc)

DCL1 (Q7S8J7.1), DCL2(Q7SCC1.3); *C. parasitica*(Cp) DCL1(Q2VF19.1), DCL2 (Q2VF18.1); *A. nidulans*(An) DCL2(P0C5H7.1); *M. circinelloides*(Mc) DCL1 (CAK32533.1), DCL2(CAZ65730.1); *P. chrysogenum*(Pc) DCL1 (XP\_002567731.1), DCL2 (XP\_002558177.1); *M. oryzae*(Mo) DCL1(A4RKC3.2), DCL2(A4RHU9.3); *A. fumigatus*(Afu) DCL1(Q4WVE3.3), DCL2(Q4WA22.2); *A. clavatus*(Ac) DCL1(A1CBC9.2), DCL2(A1C9M6.1); *A. niger*(*A. niger*) DCL1(A2RAF3.2), DCL2(A2R345.2), DCL2(A2QX45.2); *A. oryzae*(Ao) DCL1(XP\_001824024.2), DCL2(XP\_001818742.1); *A. terreus*(*A. terreus*) DCL1(Q0CW42.2), DCL2(Q0CEI2.2).

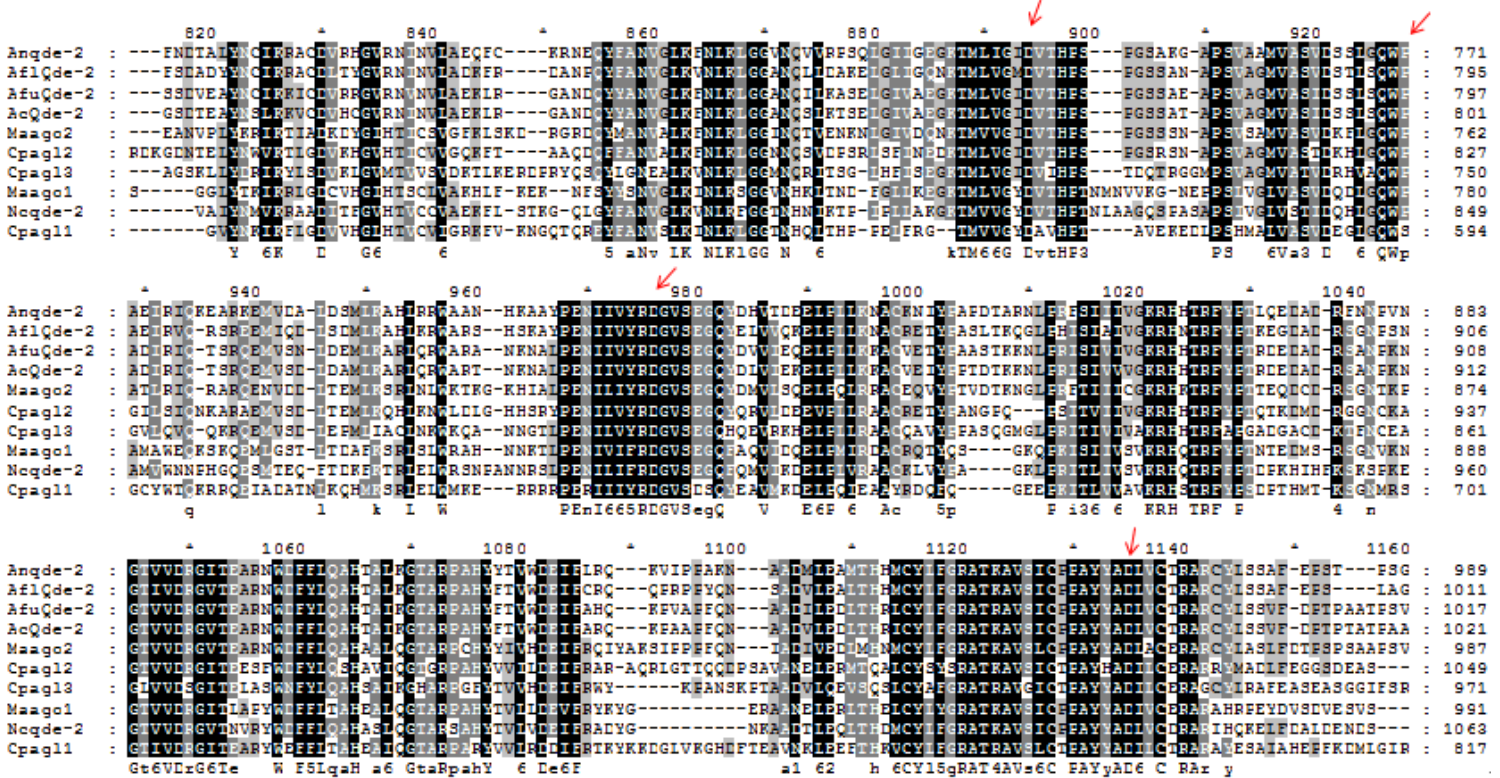

Fig.S2 Alignment profile of PIWI domain amino acids of *M. robertsii*. and other fungi AGO proteins. The beginning and end positions of PIWI domains in each protein are marked. Arrows indicate the conserved DDH triad residues and the conserved H residue.

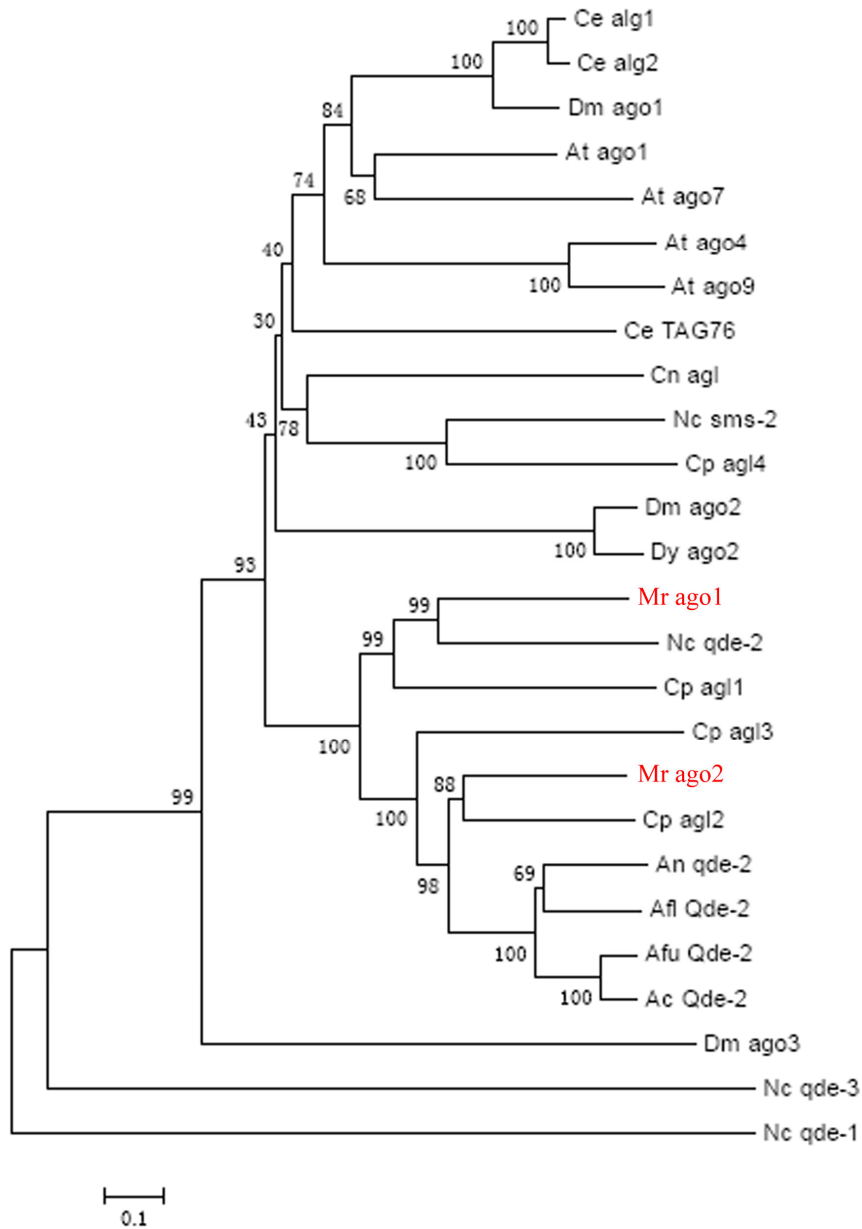

Fig.S3 Sequence alignment and phylogenetic tree of MaAGOs. Phylogenetic tree of Argonaute proteins from plants, animals, and fungi.

*D. melanogaster*(Dm) AGO1 (NP\_725341), AGO2 (NP\_730054.1), AGO3 (NP\_001036628.2); *D.yakuba* (Dy) AGO2(XP\_002095171.1); *C. elegans*(Ce) ALG1 (NP\_510322.2), ALG2 (NP\_493837.1), TAG76 (NP\_499192.1); *A. thaliana*(At) AGO1 (NP\_001185169.1), AGO4 (NP\_565633.1), AGO7 (NP\_177103.1), AGO9 (NP\_197613.2); *N. crassa*(Nc) SMS-2(XP\_958586.1), QDE-1 (Q9Y7G6),

QDE-2(XP\_960365.2), QDE-3(Q9P8U6); *C. parasitica*(Cp) AGL1(ACY36939.1), AGL2(ACY36940.1), AGL3(ACY36941.1), AGL4(ACY36942.1); *A. nidulans*(An) QDE-2(XP\_659123.1); *A. fumigatus*(Afu) QDE-2(XP\_747330.1); *A. flavus*(Afl) QDE-2(XP\_002372786.1); *A. clavatus*(Ac) QDE-2(XP\_001276635.1); *C. neoformans*(Cn) AGL(XP\_567314.1).

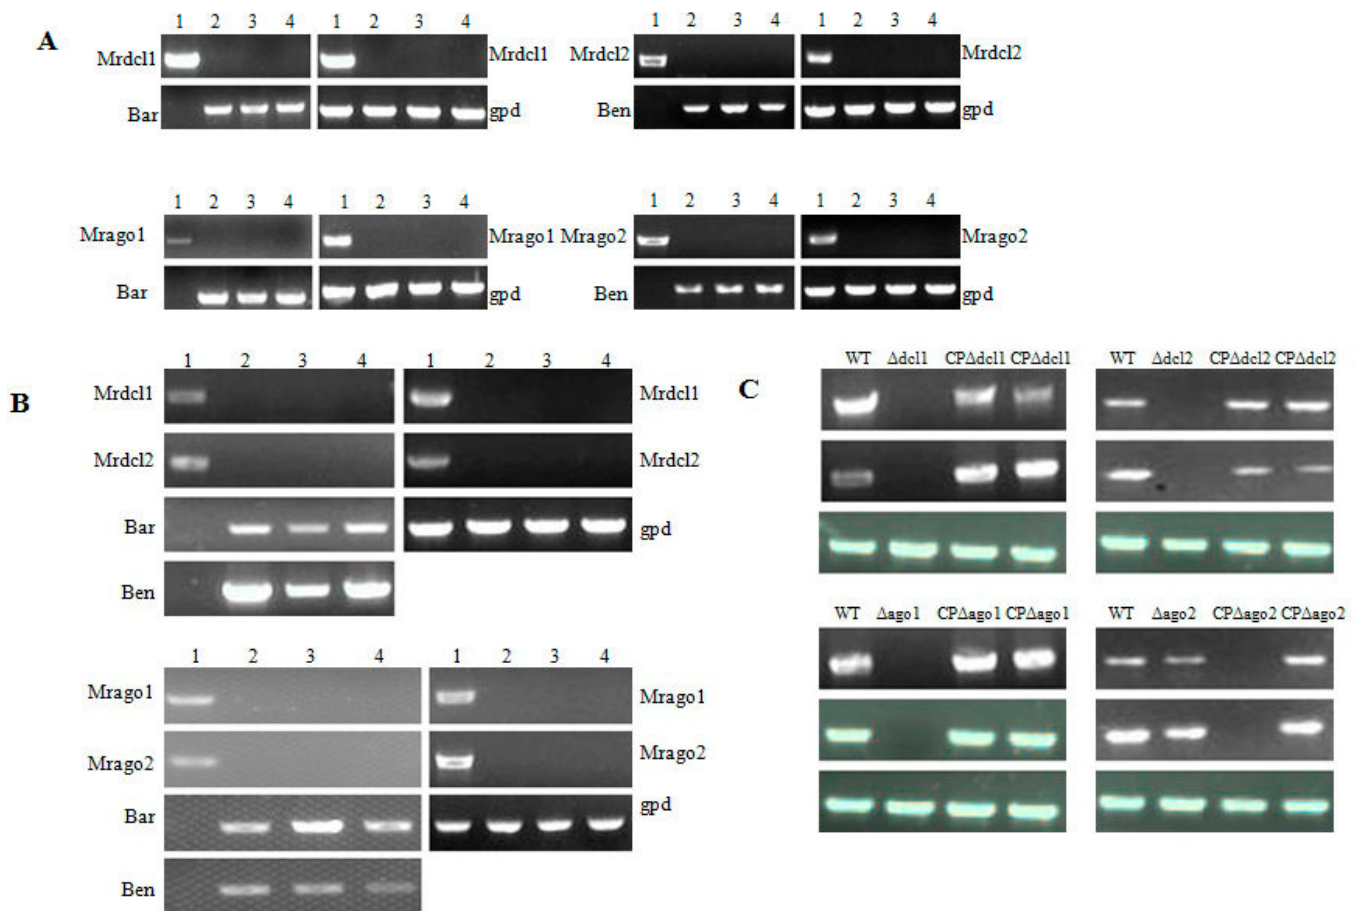

Fig.S4 Identification of knockout mutants and complemented strains by PCR and RT-PCR. (A) Identification of  $\Delta dcl1$ ,  $\Delta dcl2$ ,  $\Delta ago1$  and  $\Delta ago2$  by PCR and RT-PCR. 1: WT; 2-4 three knockout transformants. (B) Identification of  $\Delta dcl1\Delta dcl2$  and  $\Delta ago1\Delta ago2$  by PCR and RT-PCR. 1: WT; 2-4 three double-knockout transformants. (C) Identification of  $cp\Delta dcl1$ ,  $cp\Delta dcl2$ ,  $cp\Delta ago1$  and  $cp\Delta ago2$  by PCR and RT-PCR.

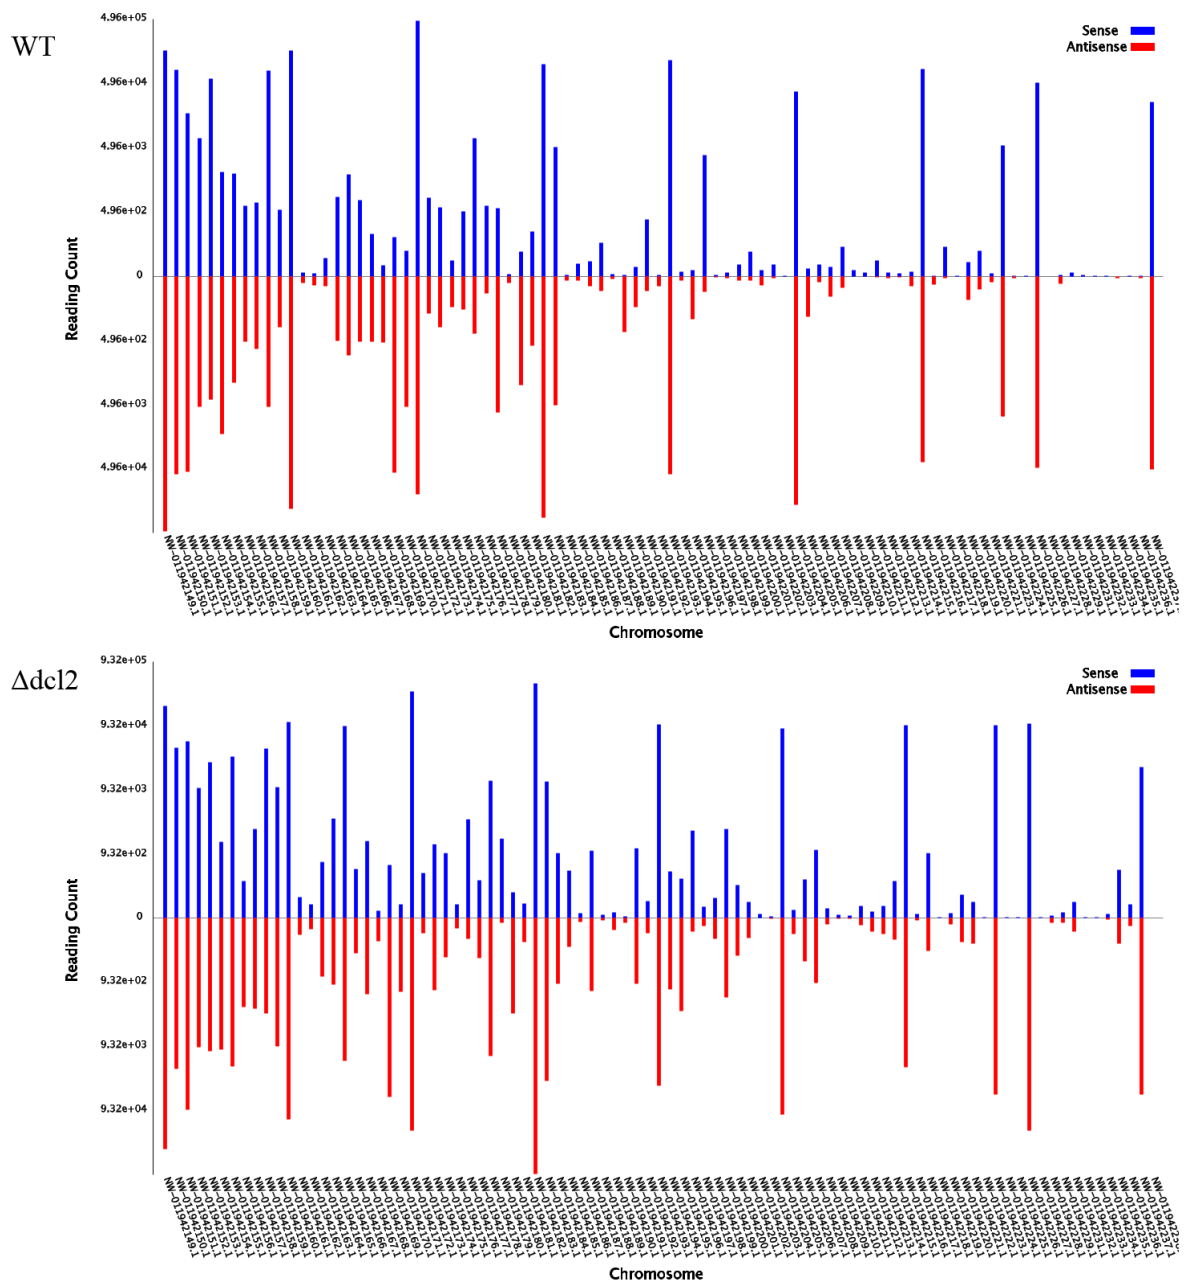

Fig.S5 sRNA distribution across different chromosomes. The horizontal coordinates are chromosomes and the vertical coordinates are count of tags. Above 0:count of tags with chromosomes positive chain. Under 0:count of tags with chromosomes negative chain.

**Table S4 Mapping statistical analysis of small RNA libraries in WT and  $\Delta dcl2$  strain**

| type          | Total reads | Clean reads | Percent %<br>(Total) | Unique sRNAs | Mapping to<br>genome | Percent %<br>(Unique) |
|---------------|-------------|-------------|----------------------|--------------|----------------------|-----------------------|
| $\Delta dcl2$ | 13684922    | 12622473    | 93.68%               | 1767138      | 917527               | 51.92%                |
| WT            | 12597803    | 11404976    | 91.95%               | 1715070      | 757695               | 44.18%                |

**Table S5 The summary distribution of sRNAs among different categories in WT and  $\Delta dcl2$** 

| sRNA<br>category   | $\Delta dcl2$  |                |               |                | WT             |                |               |                |
|--------------------|----------------|----------------|---------------|----------------|----------------|----------------|---------------|----------------|
|                    | Unique<br>sRNA | Percent<br>(%) | Total<br>sRNA | Percent<br>(%) | Unique<br>sRNA | Percent<br>(%) | Total<br>sRNA | Percent<br>(%) |
| rRNA               | 100484         | 5.6863         | 3307157       | 26.2005        | 68844          | 4.0141         | 1914470       | 16.7863        |
| tRNA               | 10550          | 0.5970         | 277385        | 2.1975         | 6078           | 0.3544         | 86668         | 0.7599         |
| snRNA              | 9313           | 0.5270         | 210425        | 1.6671         | 5566           | 0.3245         | 159043        | 1.3945         |
| snoRNA             | 2152           | 0.1218         | 24560         | 0.1946         | 1198           | 0.0699         | 9521          | 0.0835         |
| Other <sup>a</sup> | 1644639        | 93.0679        | 8802946       | 69.7403        | 1633384        | 95.2372        | 9235274       | 80.9758        |
| Total              | 1767138        | 100            | 12622473      | 100            | 1715070        | 100            | 11404976      | 100            |

<sup>a</sup> Other sRNAs indicate sequences that do not match any nonprotein-coding RNAs, or nonannotated sRNAs.

**Table S6 MiRNAs identified by deep sequencing in WT and  $\Delta dcl2$** 

| milRNA             | milRNA sequence(5'-3')  | Length (nt) | WT expression | $\Delta dcl2$ expression | $\log_2(\Delta dcl2 / WT)$ | p-value   | MFE (kcal/ mol)   |
|--------------------|-------------------------|-------------|---------------|--------------------------|----------------------------|-----------|-------------------|
| <b>novel miRNA</b> |                         |             |               |                          |                            |           |                   |
| novel_mir_11       | TAGCACAACATGACAATCGG    | 20          | 36125         | 16                       | -11.287                    | 0         | -52.70            |
| novel_mir_33       | TAACAAAATAATGGCACCTCT   | 21          | 889           | 0                        | -12.9283                   | 1.9E-288  | -62.3             |
| novel_mir_37       | TTGAAGGGTTGAAAAACAGG    | 21          | 28            | 0                        | -7.93964                   | 8.25E-10  | -64.3             |
| novel_mir_39       | TGGACCGATTGCATGGAAGGC   | 21          | 25            | 0                        | -7.7761                    | 7.71E-09  | -26.7             |
| novel_mir_41       | TGTTTGCAGCCGGGCGGTGCTT  | 23          | 18            | 0                        | -7.30223                   | 1.42E-06  | -37.3             |
| novel_mir_26       | TAGTTGGTGTATTACGTTATTC  | 22          | 8             | 0                        | -6.1323                    | 0.0018238 | -60.8             |
| novel_mir_21       | TAGATGCGGAATGGCTTGTG    | 20          | 7             | 0                        | -5.93966                   | 1.25E-05  | -65               |
| novel_mir_3        | TACCCGTTGGCAACTAAGTG    | 20          | 0             | 7                        | 5.793311                   | 0.0004193 | -33.1/-31.1/-49.1 |
| novel_mir_43       | TCATCAAGTCGTGCTCGCCCAT  | 22          | 6             | 0                        | -5.71727                   | 4.94E-06  | -30.2             |
| novel_mir_6        | TTCATCTGTCTATATATTATTT  | 22          | 0             | 6                        | 5.570918                   | 1.18E-05  | -28.20            |
| novel_mir_29       | TTTGTTCGAGCCCTTCTG      | 21          | 5             | 0                        | -5.45423                   | 8.46E-06  | -36.40            |
| novel_mir_4        | TTTGTGTGAGGACTGAGCCGTG  | 22          | 0             | 5                        | 5.307884                   | 3.11E-05  | -29.90            |
| novel_mir_10       | GAGAAGCAAGCGCTGGGCATG   | 21          | 0             | 5                        | 5.307884                   | 7.66E-08  | -32.20            |
| <b>known miRNA</b> |                         |             |               |                          |                            |           |                   |
| man-milR-10        | AGGGAUCUAGAAAAGAAGGCUU  | 22          | 182           | 1                        | -7.65455                   | 1.17E-57  | -100.00           |
| man-milR-13        | CGACGACUCUGGCGAGGACAA   | 21          | 9             | 25                       | 1.327658                   | 0.014191  | -28.30            |
| man-milR-14        | UUAAAGAUGUGGAAAAGAAGGC  | 22          | 207           | 0                        | -10.8258                   | 9.76E-68  | -105.32           |
| man-milR-15        | GAUGUCGAAUCGUGCCGGGGCUC | 23          | 534           | 0                        | -12.193                    | 1.5E-173  | -102.70           |
| man-milR-2         | UACAAGGGCACGAGCAAGGU    | 20          | 90            | 1                        | -6.63862                   | 3.47E-28  | -66.60            |
| man-milR-3         | UUGUCGAGGCAUACCACUAUU   | 21          | 131           | 0                        | -10.1657                   | 3.84E-43  | -41.00/-36.40     |
| man-milR-5         | UUAACAAGGCGUCGAGGGAUA   | 21          | 10422         | 7                        | -10.6862                   | 0         | -55.30            |
| man-milR-6         | UUUGGAGAGGCUGCUGUGUUU   | 21          | 56            | 0                        | -8.93961                   | 7.16E-19  | -31.10            |
| man-milR-7         | GCGGGUGCUGAGAAAGCGUUUA  | 22          | 562           | 1307                     | 1.071287                   | 6.51E-53  | -49.69            |
| man-milR-9         | UGCCUAGGCAGGUAGAUCAG    | 21          | 16530         | 7                        | -11.3517                   | 0         | -72.90            |
| man-milR-1         | UAUCUUGUGGACUAAUAGGUA   | 21          | 4628          | 9004                     | 0.813466                   | 1.38E-07  | -26.60            |
| man-milR-8         | UUGCAUGAUGAGACUUAUUU    | 20          | 258           | 529                      | 0.889186                   | 1.21E-05  | -20.03            |
| man-milR-12        | AGACCUCGUUGAUGCUGGCAUU  | 22          | 0             | 4                        | 4.9855                     | 4.10E-07  | -37.40            |
| man-milR-4         | UCGAGGAGCAGAAGCUGAUCUU  | 22          | 8             | 1                        | -3.14671                   | 4.79E-07  | -31.60            |
